# Supplementary material for: Effects of solids retention times on electro-selective fermentation using Scenedesmus acutus biomass
Source: Royal Society of Chemistry journal article supplement (doi:10.1039/d0se00930j), 2020-01-01
Supplement: d0se00930j1.pdf [file d0se00930j1.pdf]

## Supplemental Information

### **Effects of Solids Retention Times on Electro-Selective Fermentation Using *Scenedesmus acutus* Biomass**

Yuanzhe Liu<sup>1</sup>, Yen-Jung Sean Lai<sup>1</sup>, Bruce E. Rittmann<sup>1</sup>

\*Corresponding author:

Yuanzhe Liu: [yliu316@asu.edu](mailto:yliu316@asu.edu)

This supporting information contains 5 pages, with 2 sections: Estimating the Solids Retention time and Profiling of Microbial Communities in MEC-B; . This includes Equations S1 to S3; Table S1, and Figure S1.

## S1. Estimating the Solids Retention Time (SRT)

The *SRT* of an ESF reactor is not the same as its Hydraulic Retention Time (*HRT*) due to the biofilm on the anode. Likewise, the *SRT* of the entire ESF system is a composite of the *SRT*s of the suspended biomass and the biofilm. Thus, a change to the *HRT* does not necessarily equal a change to the *SRT* system.

A biofilm's average *SRT* is the reciprocal of the biofilm's average first-order detachment rate ( $b_{det}$ ) (Rittmann and McCarty, 2001), which can be estimated *a priori* by

$$b_{det} = 8.42 * 10^{-2} \left( \frac{\sigma}{1 + 433.2(L_f - 0.003)} \right)^{0.58} \quad (\text{Eq. S1})$$

where  $L_f$  is the biofilm thickness (cm),  $X_f$  is the biofilm density (mg / cm<sup>3</sup>), and  $\sigma$  is the shear stress in dyne / cm<sup>2</sup> (the same as g/cm<sup>2</sup>-s). The  $\sigma$  values in the MECs can be bracketed by 0.02 dyne /cm<sup>2</sup> to 1 dyne/cm<sup>2</sup>, based on modest to strong mixing intensity (Rittmann and McCarty, 2001). By using values this  $\sigma$  range,  $X_f = 40$  mg /cm<sup>3</sup>, and  $L_f = 0.01$  cm, I computed a  $b_{det}$  range of 0.004 d<sup>-1</sup> to 0.4 d<sup>-1</sup>. which leads to range of biofilm *SRT*s of 260 d to 27 d.

Detachment of biofilm biomass augments the suspended biomass. When the suspension receives input active biomass, its *SRT* increases according to Rittmann and McCarty (1):

$$SRT_{planktonic} = \frac{X_a V}{Q X_a - Q X_a^0} = \frac{X_a V}{Q X_a - b_{det} X_f L_f A_b} \quad (\text{Eq S2})$$

where  $X_a$  is the concentration of active biomass of the planktonic biomass,  $V$  is the ESF reactor's working volume,  $Q$  is the volumetric flow rate,  $Q * X_a^0$  is the detachment rate of the biofilm (and

the rate of biomass addition to the suspension),  $X_f L_f$  is the mass of biofilm per unit surface area, and  $A_b$  is the biofilm surface area.

An overall  $SRT$  can be computed for all of the biomass in the ESF reactor: planktonic + biofilm. Starting from the definition of  $SRT$  and combining planktonic active biomass and biofilm active biomass, the  $SRT_{overall}$  is:

$$SRT_{overall} = \frac{X_a V + X_f L_f A}{Q X_a} = HRT + \frac{X_f L_f A}{Q X_a} \quad (Eq. S3)$$

Eq. S3 shows that the total  $SRT$  is always larger than the  $HRT$  due to the accumulation of biofilm biomass.

Assuming an active-biomass concentration ( $X_a$ ) of 3000 mg VSS /L in the suspended phase, a biofilm density ( $X_f$ ) of 40 mg /cm<sup>3</sup>, and a biofilm thickness ( $L_f$ ) of 0.01cm, along with known biofilm area of 49 cm<sup>2</sup> and an anode chamber volume of 200 mL, Equations 5.S2 and 5.S3 yield the  $SRT$  values in Table 5.S1. The overall  $SRTs$  are only slightly greater than than the  $HRTs$ , regardless of long or short  $HRTs$  (6 d vs 2d) and different shear stress caused by different mixing intensities ( $b_{det} = 0.004$  or  $0.04$  d<sup>-1</sup>), because the suspended biomass ( $X_a V$ ) dominates the biofilm biomass ( $X_f L_f A$ ). Thus, it accurate to use the  $HRT$  as a surrogate of the overall  $SRT$  of the ESF reactors.

**Table S 1** Calculated values of  $SRT_{\text{planktonic}}$ ,  $SRT_{\text{biofilm}}$ , and  $SRT_{\text{overall}}$  using assumptions of high and low shear stress. All SRT values are in d.

|                           | Low shear stress<br>(0.02 dyne/cm <sup>2</sup> ) | High shear stress<br>(1 dyne/cm <sup>2</sup> ) |
|---------------------------|--------------------------------------------------|------------------------------------------------|
| 6-d HRT                   |                                                  |                                                |
| $SRT_{\text{biofilm}}$    | 250                                              | 25                                             |
| $SRT_{\text{planktonic}}$ | 6.1                                              | 6.6                                            |
| $SRT_{\text{overall}}$    | 6.2                                              | 6.2                                            |
| 2-d HRT                   |                                                  |                                                |
| $SRT_{\text{biofilm}}$    | 250                                              | 25                                             |
| $SRT_{\text{planktonic}}$ | 2.0                                              | 2.1                                            |
| $SRT_{\text{overall}}$    | 2.1                                              | 2.1                                            |

## S2. Profiling of Microbial Communities in MEC-B

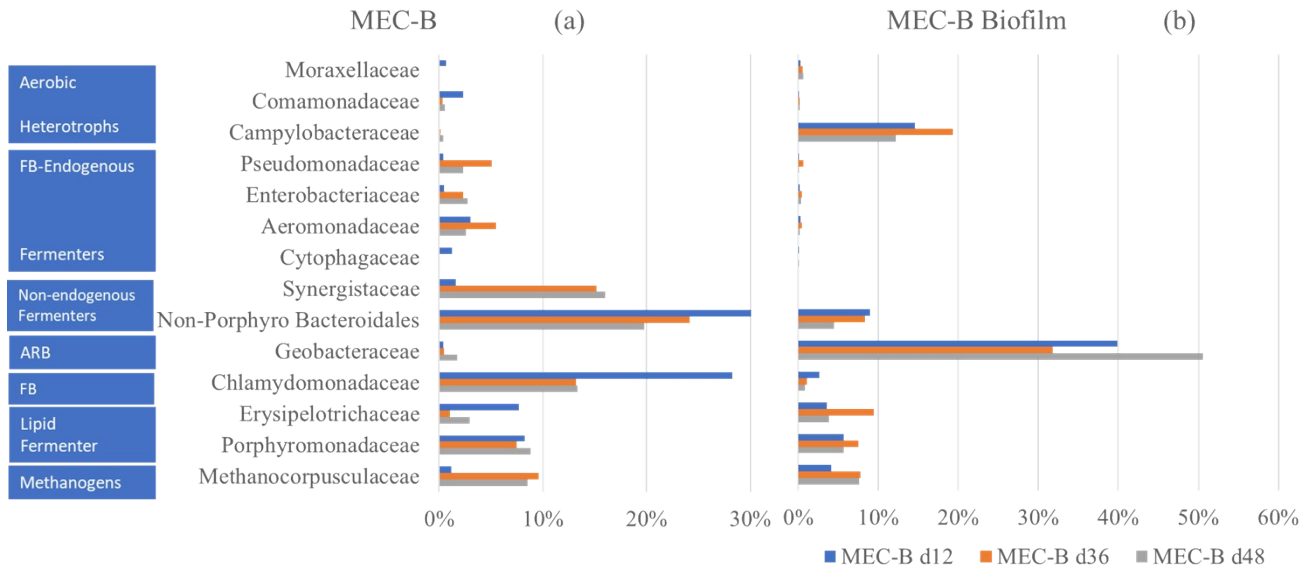

**Figure S1.** Phylogenetic profiling of the ESF anode effluent in MEC-B (a) and biofilm in MEC-B (b). The horizontal axis presents the percentage abundance of the families based on the total reads of the 16S rRNA gene. Functions associated with each family are shown to the left.

### **S3. Equations for Calculation of Extractability, Saturation and Lipid Recovery**

$$\text{Ext (\%)} = [\text{Extracted LCFA COD (mg COD /L)}]_{\text{ESF}} / [\text{Total LCFA COD (mg COD/L)}]_{\text{FB}} * 100\%$$

*(Eq. S1)*

$$\text{Sat (\%)} = [\text{Saturated LCFA COD (mg COD /L)}]_{\text{ESF}} / [\text{Total LCFA COD (mg COD/L)}]_{\text{ESF}} * 100\%$$

*(Eq. S2)*

$$\text{Rec (\%)} = [\text{Total LCFA COD (mg COD /L)}]_{\text{ESF}} / [\text{Total LCFA COD (mg COD/L)}]_{\text{FB}} * 100\%$$

*(Eq. S3)*
